# Supplementary material
Source: PubMed Central journal article supplement (PMC9756876)
Supplement: NIHMS1843323-supplement-RawImmunoblots.pdf [file NIHMS1843323-supplement-RawImmunoblots.pdf]

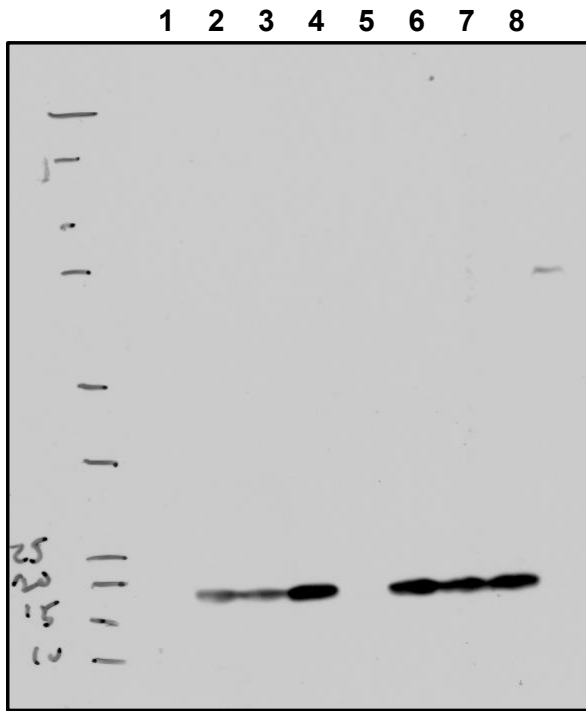

**Unprocessed blot depicted in Extended Data Figure 1a.** Full scan of the anti-FimA immunoblot depicted in Extended Data Figure 1a. Lanes 5-8 are shown in the cropped image in the figure and correspond to  $\Delta fimA-H$ , UT189,  $\Delta cydAB$ , and  $\Delta appBC\Delta cyoAB$ , respectively. Additional blots were performed to obtain sufficient sample size for statistical analyses.

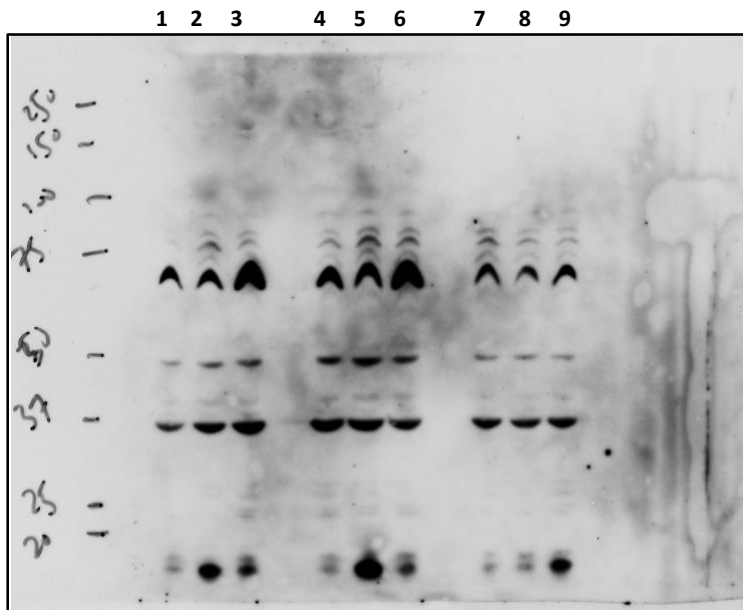

**Unprocessed blot depicted in Extended Data Figure 1b.** Full scan of the anti-FimA immunoblot depicted in Extended Data Figure 1b. Lanes 7-9 are shown in the cropped image in the figure and correspond to UT189,  $\Delta cydAB$ , and  $\Delta appBC\Delta cyoAB$ , respectively.

1 2 3 4 5 6 7 8 9 10 11 12

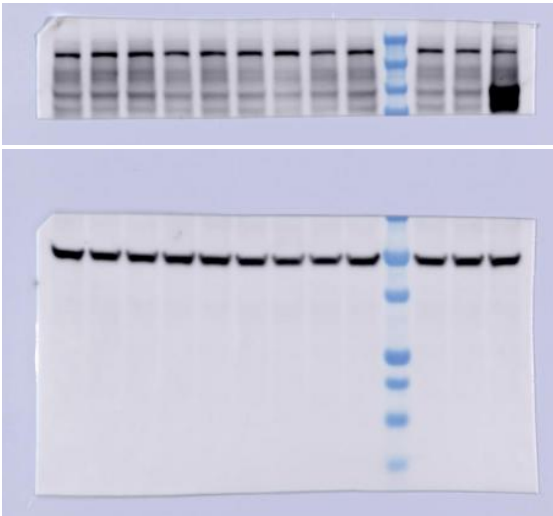

**Unprocessed blot depicted in Figure 5a.** Full scan of the anti-HIF1a (top) and anti- $\beta$  tubulin (bottom) immunoblots depicted in Figure 5a. Lanes 7 and 8 are depicted in the cropped image and correspond to mock infected and UTI89 infected samples. Given the cross-reactivity of the HIF1a antibody, sample 12 was treated with DMOG (a HIF1a stabilizing drug) during the infection process to increase HIF-1a abundance and aid in identification of the HIF-1a specific band.
